# Supplementary material
Source: publisher site journal article supplement (https://www.spandidos-publications.com/1707/downloadSupplementary)

Figure S1. Schematic representation of doxorubicin-induced oxidative and nitrosative stress and mitochondrial Cx43 involvement. Doxorubicin administration induces an increase in ROS production, that causes both the activation of the NF- $\kappa$ B pathway and mitochondria-mediated apoptosis. This leads to cell death and cardiotoxicity. The inhibition of Cx43 translocation to mitochondria further increases these effects.

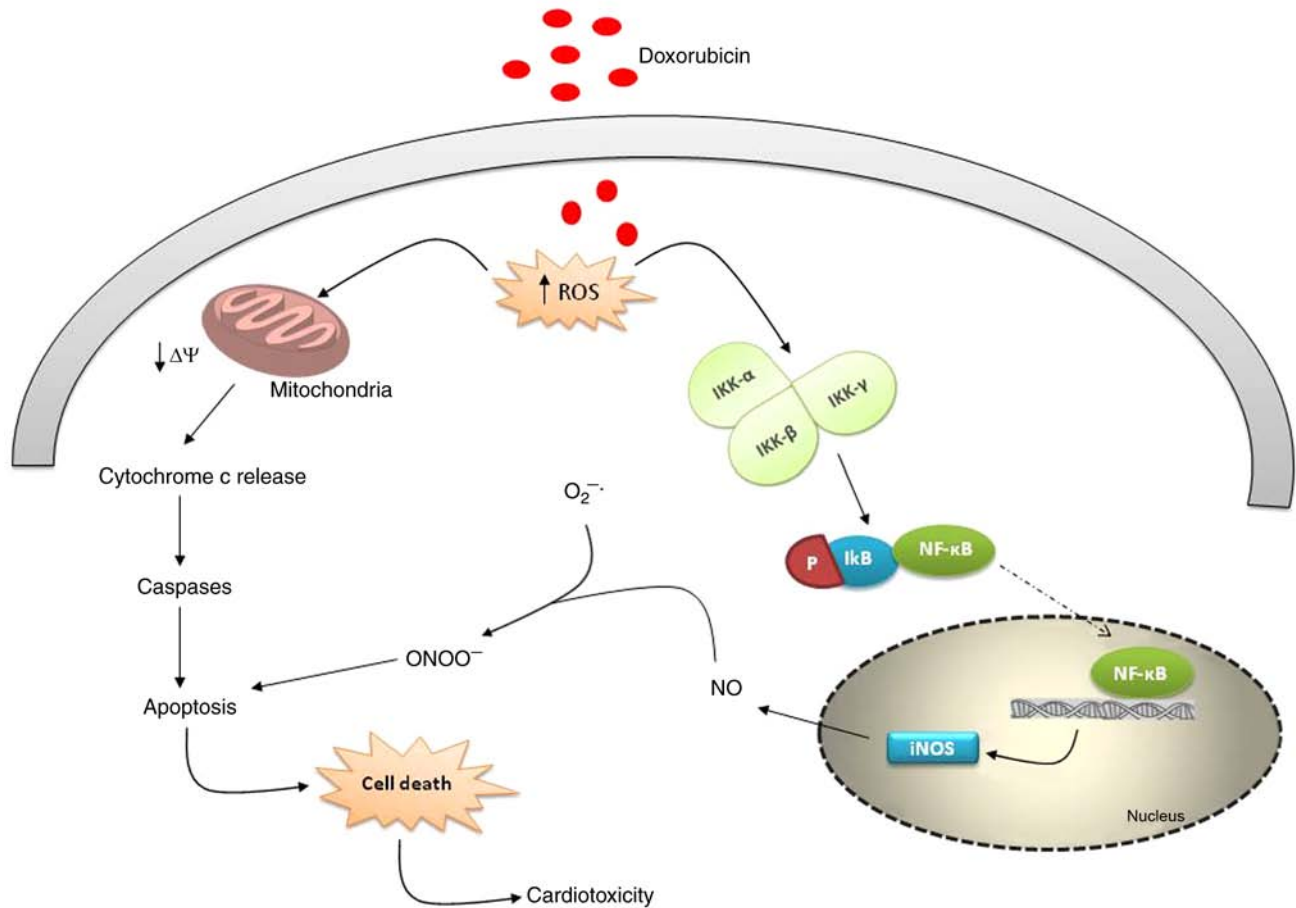

Supplement: Supplementary file 1 [file downloadSupplementary]
